# Supplementary material for: Monkfish Peptides Mitigate High Fat Diet-Induced Hepatic Steatosis in Mice
Source: MDPI journal article supplement (doi:10.3390/md20050312), 2022-05-05
Supplement: s1 [file s1]

**Supplementary**

**Table S1.** The free peptide was obtained by database search

| <b>Protein<br/>Accession</b> | <b>Peptide</b>      | <b>-10lgP</b> | <b>Mass</b> | <b>Length</b> | <b>m/z</b> | <b>z</b> |
|------------------------------|---------------------|---------------|-------------|---------------|------------|----------|
| 332500944                    | L.ITGESGAG<br>K.T   | 54.5          | 818.4134    | 9             | 410.2131   | 2        |
| 332500944                    | K.QKQREEQ<br>AEPD.G | 42.86         | 1356.627    | 11            | 679.3206   | 2        |
| 332500944                    | K.QREEQAE<br>PD.G   | 41            | 1100.473    | 9             | 551.244    | 2        |
| 332500944                    | L.RNDNSSR<br>F.G    | 36.86         | 994.458     | 8             | 498.2355   | 2        |
| 332500944                    | LTDRENQS.<br>V      | 32.48         | 961.4465    | 8             | 481.7297   | 2        |
| 332500944                    | Q.KQREEQA<br>EPD.G  | 32.25         | 1228.568    | 10            | 615.291    | 2        |
| 332500944                    | S.IAAVGGG<br>GK.K   | 24.67         | 728.418     | 9             | 365.2175   | 2        |
| 332500944                    | R.NDNSSRF.<br>G     | 22.02         | 838.3569    | 7             | 420.185    | 2        |
| 332500944                    | Q.REEQAE<br>D.G     | 21.05         | 972.4148    | 8             | 487.2145   | 2        |
| 156103922                    | L.ITGESGAG<br>K.T   | 54.5          | 818.4134    | 9             | 410.2131   | 2        |
| 156103922                    | K.QKQREEQ<br>AEPD.G | 42.86         | 1356.627    | 11            | 679.3206   | 2        |
| 156103922                    | K.QREEQAE<br>PD.G   | 41            | 1100.473    | 9             | 551.244    | 2        |
| 156103922                    | L.RNDNSSR<br>F.G    | 36.86         | 994.458     | 8             | 498.2355   | 2        |
| 156103922                    | M.LTDRENQ<br>S.V    | 32.48         | 961.4465    | 8             | 481.7297   | 2        |
| 156103922                    | Q.KQREEQA<br>EPD.G  | 32.25         | 1228.568    | 10            | 615.291    | 2        |
| 156103922                    | S.IAAVGGG<br>GK.K   | 24.67         | 728.418     | 9             | 365.2175   | 2        |
| 156103922                    | R.NDNSSRF.<br>G     | 22.02         | 838.3569    | 7             | 420.185    | 2        |
| 156103922                    | Q.REEQAE<br>D.G     | 21.05         | 972.4148    | 8             | 487.2145   | 2        |
| 510950687                    | L.ITGESGAG<br>K.T   | 54.5          | 818.4134    | 9             | 410.2131   | 2        |
| 510950687                    | K.QKQREEQ<br>AEPD.G | 42.86         | 1356.627    | 11            | 679.3206   | 2        |
| 510950687                    | K.QREEQAE<br>PD.G   | 41            | 1100.473    | 9             | 551.244    | 2        |
| 510950687                    | L.RNDNSSR<br>F.G    | 36.86         | 994.458     | 8             | 498.2355   | 2        |
| 510950687                    | M.LTDRENQ<br>S.V    | 32.48         | 961.4465    | 8             | 481.7297   | 2        |

|           |                     |       |          |    |          |   |
|-----------|---------------------|-------|----------|----|----------|---|
| 510950687 | Q.KQREEQA<br>EPD.G  | 32.25 | 1228.568 | 10 | 615.291  | 2 |
| 510950687 | D.MLLVTNN<br>P.Y    | 24.72 | 900.4739 | 8  | 451.2477 | 2 |
| 510950687 | R.NDNSSRF.<br>G     | 22.02 | 838.3569 | 7  | 420.185  | 2 |
| 510950687 | Q.REEQAE<br>D.G     | 21.05 | 972.4148 | 8  | 487.2145 | 2 |
| 156103926 | L.ITGESGAG<br>K.T   | 54.5  | 818.4134 | 9  | 410.2131 | 2 |
| 156103926 | K.KQKREEQ<br>AEPD.G | 42.86 | 1356.627 | 11 | 679.3206 | 2 |
| 156103926 | K.QREEQAE<br>PD.G   | 41    | 1100.473 | 9  | 551.244  | 2 |
| 156103926 | V.RNDNSSR<br>F.G    | 36.86 | 994.458  | 8  | 498.2355 | 2 |
| 156103926 | M.LTDRENQ<br>S.V    | 32.48 | 961.4465 | 8  | 481.7297 | 2 |
| 156103926 | Q.KQREEQA<br>EPD.G  | 32.25 | 1228.568 | 10 | 615.291  | 2 |
| 156103926 | T.VRNDNSS<br>RF.G   | 28.21 | 1093.527 | 9  | 547.77   | 2 |
| 156103926 | R.NDNSSRF.<br>G     | 22.02 | 838.3569 | 7  | 420.185  | 2 |
| 156103926 | Q.REEQAE<br>D.G     | 21.05 | 972.4148 | 8  | 487.2145 | 2 |
| 156103924 | L.ITGESGAG<br>K.T   | 54.5  | 818.4134 | 9  | 410.2131 | 2 |
| 156103924 | K.KQKREEQ<br>AEPD.G | 42.86 | 1356.627 | 11 | 679.3206 | 2 |
| 156103924 | K.QREEQAE<br>PD.G   | 41    | 1100.473 | 9  | 551.244  | 2 |
| 156103924 | V.RNDNSSR<br>F.G    | 36.86 | 994.458  | 8  | 498.2355 | 2 |
| 156103924 | M.LTDRENQ<br>S.V    | 32.48 | 961.4465 | 8  | 481.7297 | 2 |
| 156103924 | Q.KQREEQA<br>EPD.G  | 32.25 | 1228.568 | 10 | 615.291  | 2 |
| 156103924 | T.VRNDNSS<br>RF.G   | 28.21 | 1093.527 | 9  | 547.77   | 2 |
| 156103924 | R.NDNSSRF.<br>G     | 22.02 | 838.3569 | 7  | 420.185  | 2 |
| 156103924 | Q.REEQAE<br>D.G     | 21.05 | 972.4148 | 8  | 487.2145 | 2 |
| 332500904 | L.ITGESGAG<br>K.T   | 54.5  | 818.4134 | 9  | 410.2131 | 2 |
| 332500904 | K.KQKREEQ<br>AEPD.G | 42.86 | 1356.627 | 11 | 679.3206 | 2 |
| 332500904 | K.QREEQAE<br>PD.G   | 41    | 1100.473 | 9  | 551.244  | 2 |
| 332500904 | A.RNDNSSR<br>F.G    | 36.86 | 994.458  | 8  | 498.2355 | 2 |

|           |                     |       |          |    |          |   |
|-----------|---------------------|-------|----------|----|----------|---|
| 332500904 | Q.KQREEQA<br>EPD.G  | 32.25 | 1228.568 | 10 | 615.291  | 2 |
| 332500904 | S.IAAVGGG<br>GK.K   | 24.67 | 728.418  | 9  | 365.2175 | 2 |
| 332500904 | R.NDNSSRF.<br>G     | 22.02 | 838.3569 | 7  | 420.185  | 2 |
| 332500904 | Q.REEQAE<br>D.G     | 21.05 | 972.4148 | 8  | 487.2145 | 2 |
| 332500946 | L.ITGESGAG<br>K.T   | 54.5  | 818.4134 | 9  | 410.2131 | 2 |
| 332500946 | K.QKQREEQ<br>AEPD.G | 42.86 | 1356.627 | 11 | 679.3206 | 2 |
| 332500946 | K.QREEQAE<br>PD.G   | 41    | 1100.473 | 9  | 551.244  | 2 |
| 332500946 | V.RNDNSSR<br>F.G    | 36.86 | 994.458  | 8  | 498.2355 | 2 |
| 332500946 | Q.KQREEQA<br>EPD.G  | 32.25 | 1228.568 | 10 | 615.291  | 2 |
| 332500946 | T.VRNDNSS<br>RF.G   | 28.21 | 1093.527 | 9  | 547.77   | 2 |
| 332500946 | R.NDNSSRF.<br>G     | 22.02 | 838.3569 | 7  | 420.185  | 2 |
| 332500946 | Q.REEQAE<br>D.G     | 21.05 | 972.4148 | 8  | 487.2145 | 2 |
| 156103928 | L.ITGESGAG<br>K.T   | 54.5  | 818.4134 | 9  | 410.2131 | 2 |
| 156103928 | K.QKQREEQ<br>AEPD.G | 42.86 | 1356.627 | 11 | 679.3206 | 2 |
| 156103928 | K.QREEQAE<br>PD.G   | 41    | 1100.473 | 9  | 551.244  | 2 |
| 156103928 | L.RNDNSSR<br>F.G    | 36.86 | 994.458  | 8  | 498.2355 | 2 |
| 156103928 | Q.KQREEQA<br>EPD.G  | 32.25 | 1228.568 | 10 | 615.291  | 2 |
| 156103928 | R.NDNSSRF.<br>G     | 22.02 | 838.3569 | 7  | 420.185  | 2 |
| 156103928 | Q.REEQAE<br>D.G     | 21.05 | 972.4148 | 8  | 487.2145 | 2 |
| 510950689 | L.ITGESGAG<br>K.T   | 54.5  | 818.4134 | 9  | 410.2131 | 2 |
| 510950689 | K.QKQREEQ<br>AEPD.G | 42.86 | 1356.627 | 11 | 679.3206 | 2 |
| 510950689 | K.QREEQAE<br>PD.G   | 41    | 1100.473 | 9  | 551.244  | 2 |
| 510950689 | L.RNDNSSR<br>F.G    | 36.86 | 994.458  | 8  | 498.2355 | 2 |
| 510950689 | Q.KQREEQA<br>EPD.G  | 32.25 | 1228.568 | 10 | 615.291  | 2 |
| 510950689 | R.NDNSSRF.<br>G     | 22.02 | 838.3569 | 7  | 420.185  | 2 |
| 510950689 | Q.REEQAE<br>D.G     | 21.05 | 972.4148 | 8  | 487.2145 | 2 |

|            |                             |       |          |    |          |   |
|------------|-----------------------------|-------|----------|----|----------|---|
| 1786483305 | M.IGAPDMA<br>FPR.M          | 35.38 | 1073.533 | 10 | 537.7726 | 2 |
| 1786483305 | A.GASVDLT.<br>I             | 20.92 | 661.3282 | 7  | 662.3401 | 1 |
| 288909106  | F.LVSDVAIL<br>.T            | 28.41 | 828.4957 | 8  | 415.2537 | 2 |
| 288909106  | E.NKALGLT                   | 23.84 | 715.4229 | 7  | 358.7202 | 2 |
| 288909106  | P.FIIAALT.I                 | 22.47 | 747.4531 | 7  | 374.7337 | 2 |
| 33313529   | K.IIAPPERK<br>Y.S           | 23.15 | 1085.623 | 9  | 543.8176 | 2 |
| 288908941  | Y.TKTLTISP<br>N(+.98)N.L    | 21.23 | 1088.571 | 10 | 545.288  | 2 |
| 288909146  | M.MVSIGLN<br>Q.P            | 28.17 | 860.4426 | 8  | 431.2262 | 2 |
| 289183130  | A.EGVETVT.<br>T             | 21.05 | 733.3494 | 7  | 367.684  | 2 |
| 288909148  | K.DLLGFMA<br>VLL.A          | 23.19 | 1090.61  | 10 | 546.313  | 2 |
| 289183312  | I.KTYLVFL<br>LT.L           | 22.42 | 1209.737 | 10 | 605.8715 | 2 |
| 288908968  | Q.EAIWLVL.<br>P             | 23.31 | 842.4902 | 7  | 422.2497 | 2 |
| 685824075  | D.LVGFAAIL<br>I             | 20.84 | 802.4952 | 8  | 402.2549 | 2 |
| 288908809  | G.LAGATAL.<br>M             | 20.33 | 615.3591 | 7  | 616.3657 | 1 |
| 288908765  | A.LVAGGVV<br>FSVML.L        | 23.68 | 1190.673 | 12 | 596.3397 | 2 |
| 288909094  | A.LAGGPPG<br>V              | 20.3  | 666.3701 | 8  | 334.1942 | 2 |
| 289183172  | K.LAALSVTI<br>.L            | 22.88 | 786.4851 | 8  | 394.2495 | 2 |
| 288909061  | L.MTQRGPA<br>P.L            | 21.7  | 856.4225 | 8  | 429.2217 | 2 |
| 1786483282 | L.QSSTGTL.<br>S             | 28.25 | 692.3341 | 7  | 347.1762 | 2 |
| 288908699  | T.MPVVAIL<br>T.A            | 32.35 | 842.4935 | 8  | 422.2517 | 2 |
| 25005627   | A.Q(+.98)VLI<br>PLMPVTA.F.I | 21.99 | 1328.741 | 12 | 665.3802 | 2 |
| 288909016  | H.VIIGSIF.L                 | 21.47 | 747.4531 | 7  | 748.4601 | 1 |
| 745791721  | R.LATIPAGF<br>S.K           | 22.96 | 875.4752 | 9  | 438.7425 | 2 |

**Table S2.** Free peptides with ALC% over 80 in de novo sequencing

| Peptide | ALC (%) | length | m/z      | z | Mass     |
|---------|---------|--------|----------|---|----------|
| PPLLE   | 97      | 5      | 568.3333 | 1 | 567.3268 |
| FLRLL   | 94      | 5      | 331.2231 | 2 | 660.4323 |
| LLVVV   | 93      | 5      | 542.3905 | 1 | 541.3839 |
| FCPPP   | 93      | 5      | 560.2563 | 1 | 559.2464 |
| WRPPL   | 92      | 5      | 334.6971 | 2 | 667.3806 |
| KAAGF   | 90      | 5      | 493.276  | 1 | 492.2696 |

|           |    |   |          |   |          |
|-----------|----|---|----------|---|----------|
| LVRL      | 90 | 5 | 307.2228 | 2 | 612.4323 |
| MLLR      | 90 | 5 | 323.2083 | 2 | 644.4044 |
| TERGY     | 90 | 5 | 313.1501 | 2 | 624.2867 |
| LLVY      | 90 | 4 | 507.3167 | 1 | 506.3104 |
| LRLL      | 89 | 5 | 314.2311 | 2 | 626.4479 |
| PPLLE     | 88 | 5 | 568.3333 | 1 | 567.3268 |
| LLVGRPR   | 88 | 7 | 405.7683 | 2 | 809.5235 |
| SSLAACK   | 88 | 7 | 352.7215 | 2 | 703.4228 |
| VVRLLP    | 87 | 6 | 348.7411 | 2 | 695.4694 |
| AAFVVP    | 87 | 6 | 302.1761 | 2 | 602.3428 |
| PLLPR     | 87 | 6 | 346.726  | 2 | 691.438  |
| LRLLF     | 86 | 5 | 331.2231 | 2 | 660.4323 |
| LRLL      | 86 | 5 | 314.2308 | 2 | 626.4479 |
| RLLLR     | 85 | 5 | 335.7397 | 2 | 669.465  |
| WGAAGGGVP | 85 | 9 | 386.1911 | 2 | 770.3711 |
| LLAW      | 85 | 4 | 502.3018 | 1 | 501.2951 |
| VVLL      | 84 | 4 | 443.322  | 1 | 442.3155 |
| RVLPR     | 84 | 5 | 320.7157 | 2 | 639.418  |
| LLVVV     | 84 | 5 | 542.3905 | 1 | 541.3839 |
| LRLL      | 84 | 5 | 314.2307 | 2 | 626.4479 |
| MLRLP     | 83 | 5 | 315.193  | 2 | 628.373  |
| VLLK      | 83 | 4 | 472.3486 | 1 | 471.342  |
| FTL       | 83 | 4 | 493.3013 | 1 | 492.2948 |
| KKLLF     | 83 | 5 | 648.4438 | 1 | 647.437  |
| LLPLPP    | 83 | 6 | 325.2177 | 2 | 648.421  |
| FLFLR     | 82 | 5 | 348.2146 | 2 | 694.4166 |
| RLLLR     | 82 | 5 | 335.7392 | 2 | 669.465  |
| LLVVR     | 82 | 5 | 300.2134 | 2 | 598.4166 |
| LLAL      | 82 | 4 | 429.3066 | 1 | 428.2999 |
| LDLLLR    | 82 | 6 | 371.7443 | 2 | 741.4749 |
| RAAHGKAPR | 81 | 9 | 482.2811 | 2 | 962.5522 |
| LFLLR     | 81 | 5 | 331.2223 | 2 | 660.4323 |
| LLVVVK    | 81 | 6 | 342.7538 | 2 | 683.4945 |
| KGSS      | 81 | 4 | 378.2019 | 1 | 377.191  |
| KLPL      | 81 | 4 | 470.3328 | 1 | 469.3264 |
| KKST      | 81 | 4 | 463.2908 | 1 | 462.2802 |
| KLLLLK    | 81 | 6 | 364.275  | 2 | 726.5367 |
| KKLHLT    | 81 | 6 | 370.2443 | 2 | 738.4752 |
| RSPGPP    | 81 | 6 | 610.3248 | 1 | 609.3234 |
| FLLLR     | 81 | 5 | 331.2231 | 2 | 660.4323 |
| LDLLR     | 81 | 5 | 315.2018 | 2 | 628.3908 |
| WLLRL     | 81 | 5 | 350.7278 | 2 | 699.4432 |
| VVVS      | 81 | 4 | 403.255  | 1 | 402.2478 |
| LLVLR     | 81 | 5 | 307.223  | 2 | 612.4323 |
| FGGPK     | 80 | 5 | 505.2766 | 1 | 504.2696 |
| KKLFGGKKK | 80 | 9 | 517.347  | 2 | 1032.681 |
| KAAR      | 80 | 4 | 445.2907 | 1 | 444.2808 |
| RVLLPR    | 80 | 6 | 377.2574 | 2 | 752.5021 |
| QPAAP     | 80 | 5 | 483.2544 | 1 | 482.2489 |
| KAAR      | 80 | 4 | 445.2907 | 1 | 444.2808 |
| FLRVL     | 80 | 5 | 324.2151 | 2 | 646.4166 |
| RALLL     | 80 | 5 | 585.4072 | 1 | 584.4009 |
| VLKL      | 80 | 4 | 472.3485 | 1 | 471.342  |

|           |    |   |          |   |          |
|-----------|----|---|----------|---|----------|
| PGPPRGGKP | 80 | 9 | 431.7477 | 2 | 861.4821 |
| TLRLF     | 80 | 5 | 325.2043 | 2 | 648.3959 |
| KKLVNPL   | 80 | 7 | 406.2751 | 2 | 810.5327 |
| PLRLLP    | 80 | 6 | 354.7415 | 2 | 707.4694 |
| HLPGSP    | 80 | 6 | 607.3192 | 1 | 606.3126 |
| MPAAKP    | 80 | 6 | 614.3292 | 1 | 613.3257 |
| EAPKAPP   | 80 | 7 | 709.3912 | 1 | 708.3806 |

**Table S3.** Source proteins of the identified peptides in Low Molecular Weight Monkfish (*Lophius litulon*) Peptides

| Protein ID | -10lgP | Area Sample 1 | Avg. Mass | Description                                                                         |
|------------|--------|---------------|-----------|-------------------------------------------------------------------------------------|
| 2          | 89.6   | 52500000      | 29575     | cardiac muscle myosin heavy chain 6 alpha partial [ <i>Lophius vaillanti</i> ]      |
| 3          | 89.6   | 52500000      | 30142     | cardiac muscle myosin heavy chain 6 alpha partial [ <i>Lophius americanus</i> ]     |
| 5          | 89.6   | 58303000      | 30920     | cardiac muscle myosin heavy chain 6 alpha partial [ <i>Antennarius striatus</i> ]   |
| 6          | 89.6   | 50648000      | 30269     | cardiac muscle myosin heavy chain 6 alpha partial [ <i>Himantolophus albinare</i> ] |
| 7          | 89.6   | 50648000      | 30170     | cardiac muscle myosin heavy chain 6 alpha partial [ <i>Oneirodes macrosteus</i> ]   |
| 8          | 89.6   | 40159000      | 28355     | cardiac muscle myosin heavy chain 6 alpha partial [ <i>Chaunax suttkusi</i> ]       |
| 9          | 89.6   | 38308000      | 27492     | cardiac muscle myosin heavy chain 6 alpha partial [ <i>Melanocetus johnsonii</i> ]  |
| 10         | 89.6   | 36933000      | 28238     | cardiac muscle myosin heavy chain 6 alpha partial [ <i>Ogcocephalus parvus</i> ]    |
| 11         | 89.6   | 36933000      | 29289     | cardiac muscle myosin heavy chain 6 alpha partial [ <i>Ogcocephalus nasutus</i> ]   |
| 138        | 0      | 20071000      | 56940     | cytochrome c oxidase subunit 1 (mitochondrion) [ <i>Oneirodes bradburyae</i> ]      |
| 23         | 0      | 30839000      | 42599     | cytochrome b (mitochondrion) [ <i>Acentrophryne dolichonema</i> ]                   |
| 1336       | 0      | 202760000     | 6313      | beta-actin partial [ <i>Lophius piscatorius</i> ]                                   |
| 944        | 0      | 357540        | 37657     | NADH dehydrogenase subunit 2 (mitochondrion) [ <i>Puck pinnata</i> ]                |
| 453        | 0      | 7732300       | 67297     | NADH dehydrogenase subunit 5 (mitochondrion) [ <i>Malthopsis jordani</i> ]          |
| 522        | 0      | 2234500       | 67027     | NADH dehydrogenase subunit 5 (mitochondrion) [ <i>Lophiodes caularis</i> ]          |
| 547        | 0      | 0             | 42160     | cytochrome b (mitochondrion) [ <i>Malthopsis jordani</i> ]                          |
| 550        | 0      | 1104600       | 66940     | NADH dehydrogenase subunit 5 (mitochondrion) [ <i>Gigantactis vanhoeffeni</i> ]     |
| 615        | 0      | 3566800       | 35419     | NADH dehydrogenase subunit 1 (mitochondrion) [ <i>Bertella idiomorpha</i> ]         |
| 632        | 0      | 20668000      | 41905     | cytb partial (mitochondrion) [ <i>Lophiodes reticulatus</i> ]                       |
| 655        | 0      | 1252600       | 50417     | NADH dehydrogenase subunit 4 (mitochondrion) [ <i>Coelophrys brevicaudata</i> ]     |
| 706        | 0      | 0             | 37798     | NADH dehydrogenase subunit 2 (mitochondrion) [ <i>Tetrabrachium ocellatum</i> ]     |

|      |   |          |       |                                                                                  |
|------|---|----------|-------|----------------------------------------------------------------------------------|
| 719  | 0 | 1595200  | 35454 | NADH dehydrogenase subunit 1<br>(mitochondrion) [Acentrophryne<br>dolichonema]   |
| 637  | 0 | 91358000 | 67522 | NADH dehydrogenase subunit 5<br>(mitochondrion) [Thaumatichthys<br>pagidostomus] |
| 981  | 0 | 3945900  | 50833 | NADH dehydrogenase subunit 4<br>(mitochondrion) [Gigantactis vanhoeffeni]        |
| 824  | 0 | 1648300  | 51022 | NADH dehydrogenase subunit 4<br>(mitochondrion) [Ceratias sp. CU44E]             |
| 809  | 0 | 9650200  | 25156 | ATPase subunit 6 (mitochondrion) [Lophiodes<br>caulinaris]                       |
| 1469 | 0 | 0        | 25173 | ATPase subunit 6 (mitochondrion)<br>[Lophiomus setigerus]                        |
| 885  | 0 | 28596000 | 29531 | cytochrome c oxidase subunit III<br>(mitochondrion) [Centrophryne spinulosa]     |
| 989  | 0 | 229680   | 39050 | short-wavelength sensitive opsin 2A alpha<br>[Lophius vaillanti]                 |
